# Supplementary material for: Observation of slow magnetic relaxation phenomena in spatially isolated π-radical ions
Source: Royal Society of Chemistry journal article supplement (doi:10.1039/d2cp06026d), 2023-01-01
Supplement: d2cp06026d1.pdf [file d2cp06026d1.pdf]

## Supporting information:

# Observation of slow magnetic relaxation phenomena in spatially isolated $\pi$ -radical ions

Shohei Koyama\*, Kazunobu Sato, Masahiro Yamashita, Ryota Sakamoto, and Hiroaki Iguchi\*

### Table of Contents

|                                                                 |     |
|-----------------------------------------------------------------|-----|
| Crystallographic data                                           | S2  |
| Cyclic voltammogram                                             | S5  |
| Spin density of BTI-xy radical                                  | S6  |
| ESR spectra                                                     | S7  |
| Input file used for fitting of $\chi_M T$ plot                  | S9  |
| $\chi_M T$ vs. $T$ plot                                         | S10 |
| Field-dependent ac susceptibility of <b>1</b> @2 K              | S11 |
| Temperature-dependent ac susceptibility of <b>1</b> @0.5 T      | S12 |
| Field-dependent ac susceptibility of <b>2</b> @5 K, 7.5 K, 10 K | S13 |
| Field-dependent relaxation time of <b>2</b> @5 K, 7.5 K, 10 K   | S14 |
| Temperature-dependent ac susceptibility of <b>2</b> @1 T        | S16 |
| The intensity of three pulse echoes in <b>1</b>                 | S17 |
| The intensity of three pulse echoes in <b>2</b>                 | S18 |
| The intensity of two pulse echo                                 | S19 |
| Solid-state Raman and absorption spectroscopy                   | S20 |

## Crystallographic data

**Table S1.** Crystallographic data of BTI-xy · Toluene

|                              |                                                                                         |
|------------------------------|-----------------------------------------------------------------------------------------|
| Radiation type, wave length  | Mo K $\alpha$ , 0.71073 Å                                                               |
| Empirical formula            | C <sub>43</sub> H <sub>27</sub> CoN <sub>3</sub> O <sub>6</sub>                         |
| Formula weight               | 681.67 g/mol                                                                            |
| Crystal system               | Monoclinic                                                                              |
| Space group                  | <i>P</i> 2 <sub>1</sub> / <i>m</i>                                                      |
| Crystal size                 | 0.2 × 0.08 × 0.08 mm <sup>3</sup>                                                       |
| Crystal color                | yellow                                                                                  |
| Crystal shape                | Needle                                                                                  |
| Unit cell dimensions         | $a = 8.8004(4)$ Å<br>$b = 18.9270(6)$ Å<br>$c = 11.5824(4)$ Å<br>$\beta = 105.010(5)$ ° |
| Temperature                  | 300 K                                                                                   |
| <i>Z</i>                     | 2                                                                                       |
| Density (calculated)         | 1.215 Mg/m <sup>3</sup>                                                                 |
| Absorption coefficient       | 0.082 mm <sup>-1</sup>                                                                  |
| $R_1, wR_2[I > 2\sigma(I)]$  | 0.0558, 0.1585                                                                          |
| $R_1, wR_2[\text{all data}]$ | 0.0688, 0.1709                                                                          |
| $F(000)$                     | 708                                                                                     |
| Goodness of fit on $F^2$     | 1.032                                                                                   |

**Table S2.** Crystallographic data of **CoCp<sub>2</sub>BTI-xy (1)**

|                                                                                      |                                                                 |
|--------------------------------------------------------------------------------------|-----------------------------------------------------------------|
| Radiation type, wave length                                                          | Mo K $\alpha$ , 0.71073 Å                                       |
| Empirical formula                                                                    | C <sub>46</sub> H <sub>27</sub> CoN <sub>3</sub> O <sub>6</sub> |
| Formula weight                                                                       | 776.63 g/mol                                                    |
| Crystal system                                                                       | Trigonal                                                        |
| Space group                                                                          | <i>R</i> -3 <i>c</i>                                            |
| Crystal size                                                                         | 0.4 × 0.3 × 0.1 mm <sup>3</sup>                                 |
| Crystal color                                                                        | Black                                                           |
| Crystal shape                                                                        | Block                                                           |
| Unit cell dimensions                                                                 | <i>a</i> = 13.8716(2) Å<br><i>c</i> = 33.7979(8) Å              |
| Temperature                                                                          | 120 K                                                           |
| <i>Z</i>                                                                             | 6                                                               |
| Density (calculated)                                                                 | 1.374 Mg/m <sup>3</sup>                                         |
| Absorption coefficient                                                               | 0.512 mm <sup>-1</sup>                                          |
| <i>R</i> <sub>1</sub> , <i>wR</i> <sub>2</sub> [ <i>I</i> > 2 $\sigma$ ( <i>I</i> )] | 0.0557, 0.1662                                                  |
| <i>R</i> <sub>1</sub> , <i>wR</i> <sub>2</sub> [all data]                            | 0.0607, 0.1712                                                  |
| <i>F</i> (000)                                                                       | 2394                                                            |
| Goodness of fit on <i>F</i> <sup>2</sup>                                             | 1.069                                                           |

**Table S3.** Crystallographic data of **CoCp\*<sub>2</sub>BTI-xy (2)**

|                              |                                                                                             |
|------------------------------|---------------------------------------------------------------------------------------------|
| Radiation type, wave length  | Mo K $\alpha$ , 0.71073 Å                                                                   |
| Empirical formula            | C <sub>56</sub> H <sub>57</sub> CoN <sub>3</sub> O <sub>6</sub>                             |
| Formula weight               | 926.97 g/mol                                                                                |
| Crystal system               | Monoclinic                                                                                  |
| Space group                  | <i>C2/c</i>                                                                                 |
| Crystal size                 | 0.15 × 0.15 × 0.05 mm <sup>3</sup>                                                          |
| Crystal color                | Dark green                                                                                  |
| Crystal shape                | Block                                                                                       |
| Unit cell dimensions         | $a = 19.8607(12)$ Å<br>$b = 18.4970(7)$<br>$c = 12.9906(6)$ Å<br>$\beta = 102.711(5)^\circ$ |
| Temperature                  | 120 K                                                                                       |
| <i>Z</i>                     | 4                                                                                           |
| Density (calculated)         | 1.323 Mg/m <sup>3</sup>                                                                     |
| Absorption coefficient       | 0.425 mm <sup>-1</sup>                                                                      |
| $R_1, wR_2[I > 2\sigma(I)]$  | 0.0760, 0.1875                                                                              |
| $R_1, wR_2[\text{all data}]$ | 0.1058, 0.2108                                                                              |
| $F(000)$                     | 1956                                                                                        |
| Goodness of fit on $F^2$     | 1.063                                                                                       |

## Cyclic Voltammogram

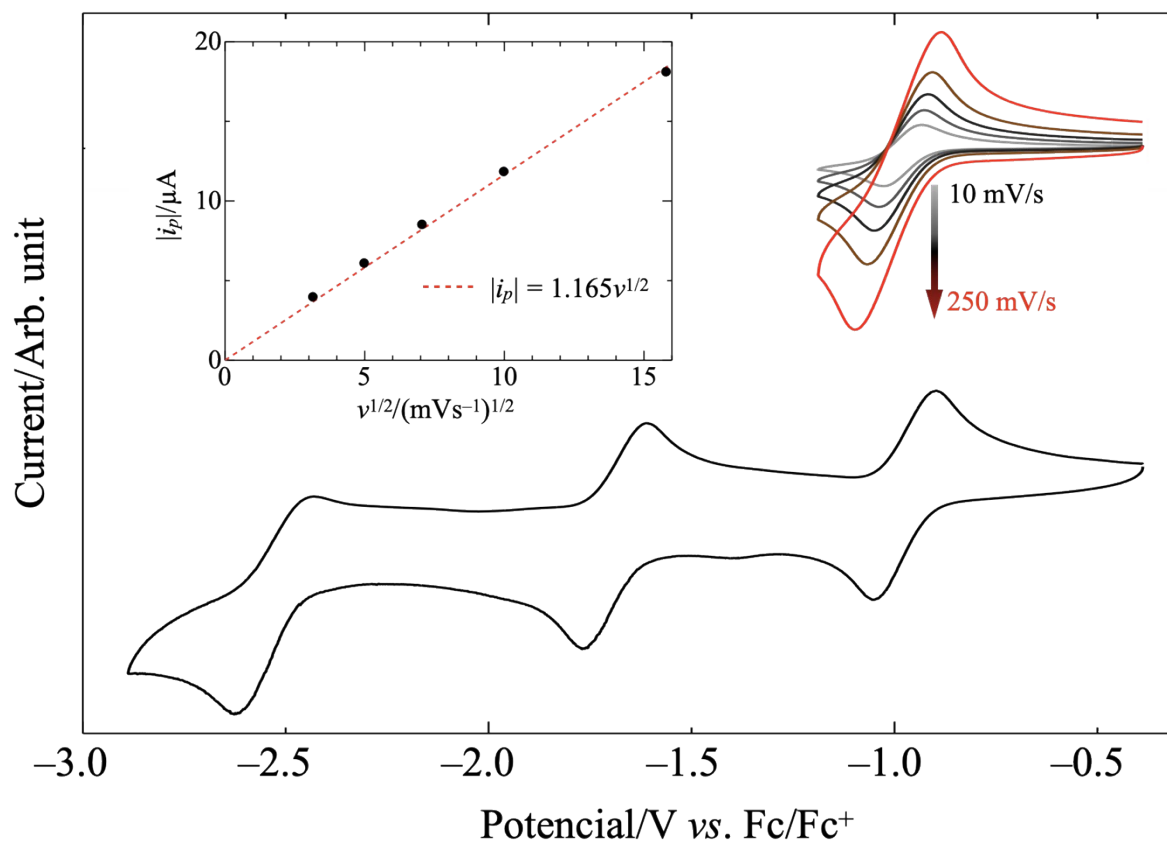

Figure S1. Cyclic voltammogram of BTI-xy. (Upper) The first reduction waves are shown for sweeps at 10, 25, 50, 100, and 250 mV/s. Inset shows the peak current plotted against 1/2 power of the sweep rates. (Bottom) The cyclic voltammogram at 100 mV/s.

### Spin density of BTI-xy radical

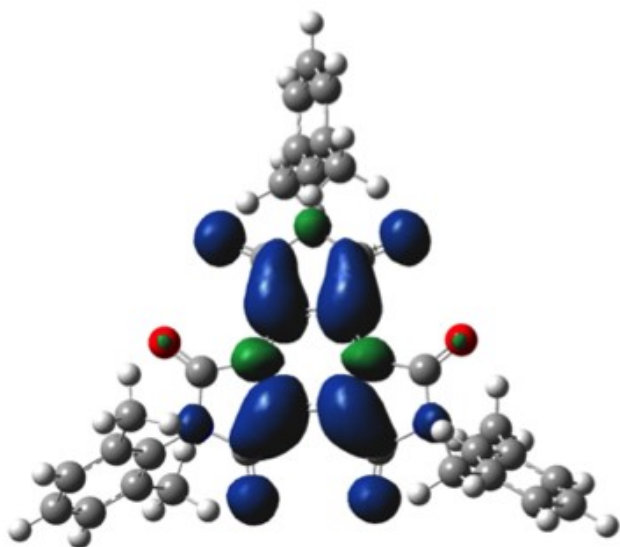

Figure S2. Spin density of BTI-xy radical calculated by DFT with optimized structure. Isosurface value:0.0004.

## ESR spectra at $-130\text{ }^{\circ}\text{C}$

(a)

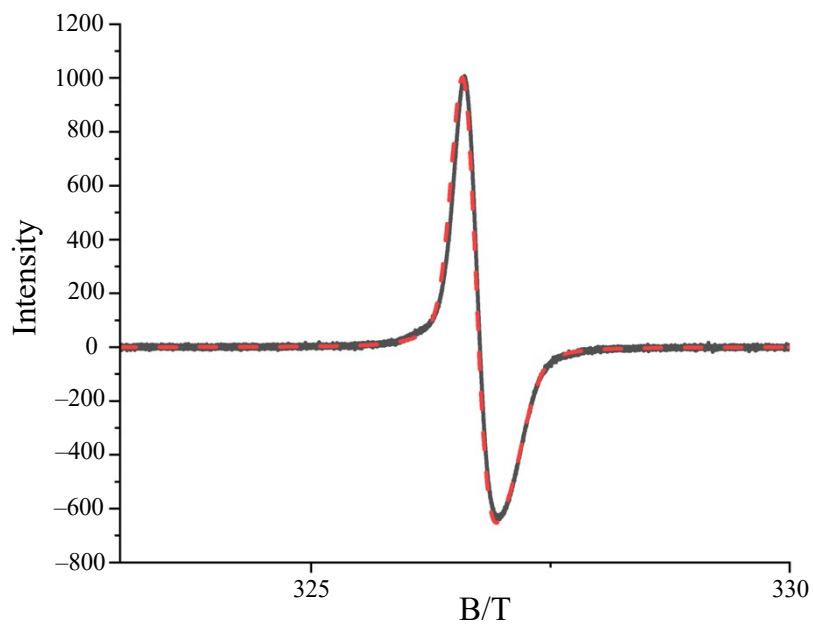

(b)

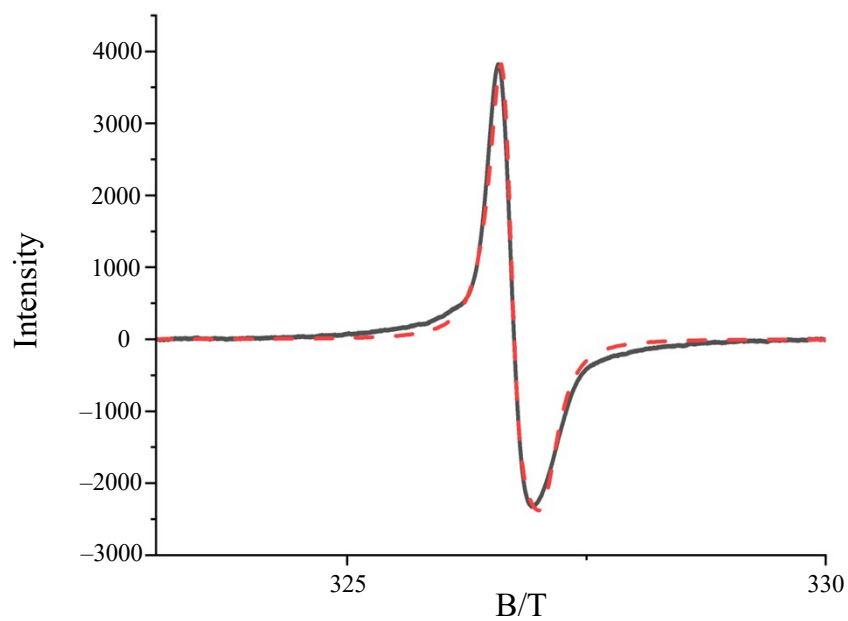

Figure S3. ESR spectra of **1** (a) and **2** (b) diluted in 0.2 mM DMF:benzene solution at  $-130\text{ }^{\circ}\text{C}$ .





Table S4. Fitting parameter of the ESR spectra of **1** (a) and **2** (b) diluted in 0.2 mM DMF:benzene solution.

|                            | <b>1</b> (RT) | <b>1</b> (-130°C) | <b>2</b> (RT) | <b>2</b> (-130°C) |
|----------------------------|---------------|-------------------|---------------|-------------------|
| Frequency/GHz              | 9.1626        | 9.1626            | 9.1614        | 9.1626            |
| Nuclear spin               | 0             | 0                 | 0             | 0                 |
| Electron spin              | 0.5           | 0.5               | 0.5           | 0.5               |
| $g_{\text{perp}}$          | 2.0044        | 2.0040            | 2.0037        | 2.0040            |
| $g_{\text{para}}$          | 2.0017        | 2.0014            | 2.0022        | 2.0016            |
| $\sigma_{\text{perp}}$ /mT | 0.28          | 0.27              | 0.19          | 0.20              |
| $\sigma_{\text{para}}$ /mT | 0.35          | 0.35              | 0.20          | 0.24              |
| Lorentz ratio/%            | 50            | 50                | 100           | 100               |
| Gauss ratio/%              | 50            | 50                | 0             | 0                 |

### **Input file used for fitting of $\chi_M T$ plot**

By utilizing the input file below, we have performed fitting to estimate the interaction between spins. For the form of the spin Hamiltonian, please refer to the PHI software User manual, available at [http://www.molmag.manchester.ac.uk/software/phi\\_manual.pdf](http://www.molmag.manchester.ac.uk/software/phi_manual.pdf) (accessed January 2023).

```
****ion
Ee
****fit
simplex
2.00
gf 1 4
----
-1
zJ
----
****mag
Tmag 1.85
****sus
bsus 0.1
****params
opmode fit s
****end
```

### $\chi_M T$ vs. $T$ plot

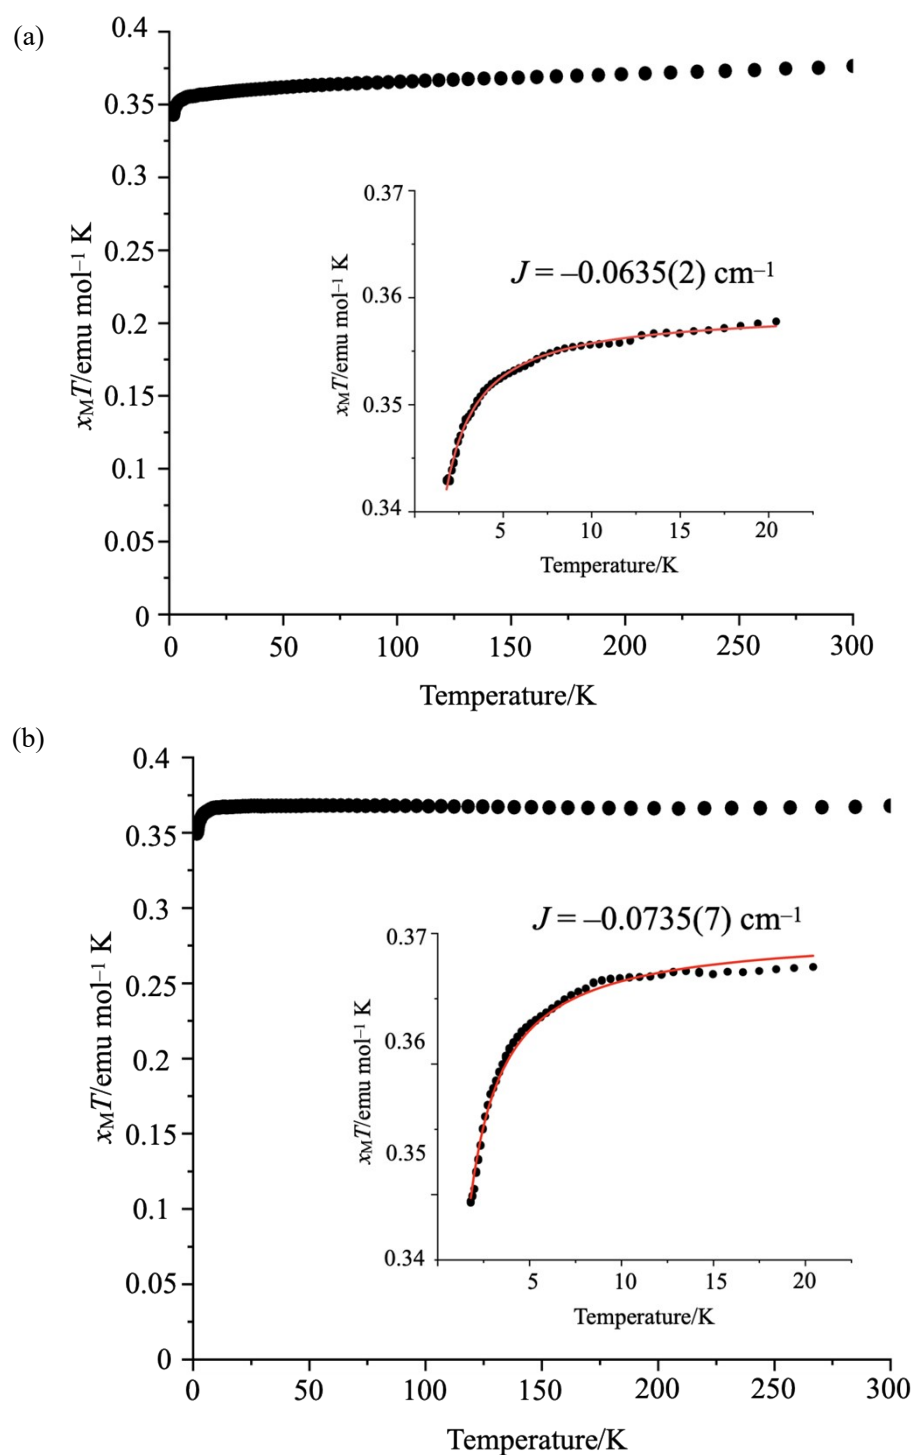

Figure S4.  $\chi_M T$  vs.  $T$  plot of **1** (a) and **2** (b). Inset shows the data focused on the temperature below 10 K.

### Field-dependent *ac* susceptibility of 1@2 K

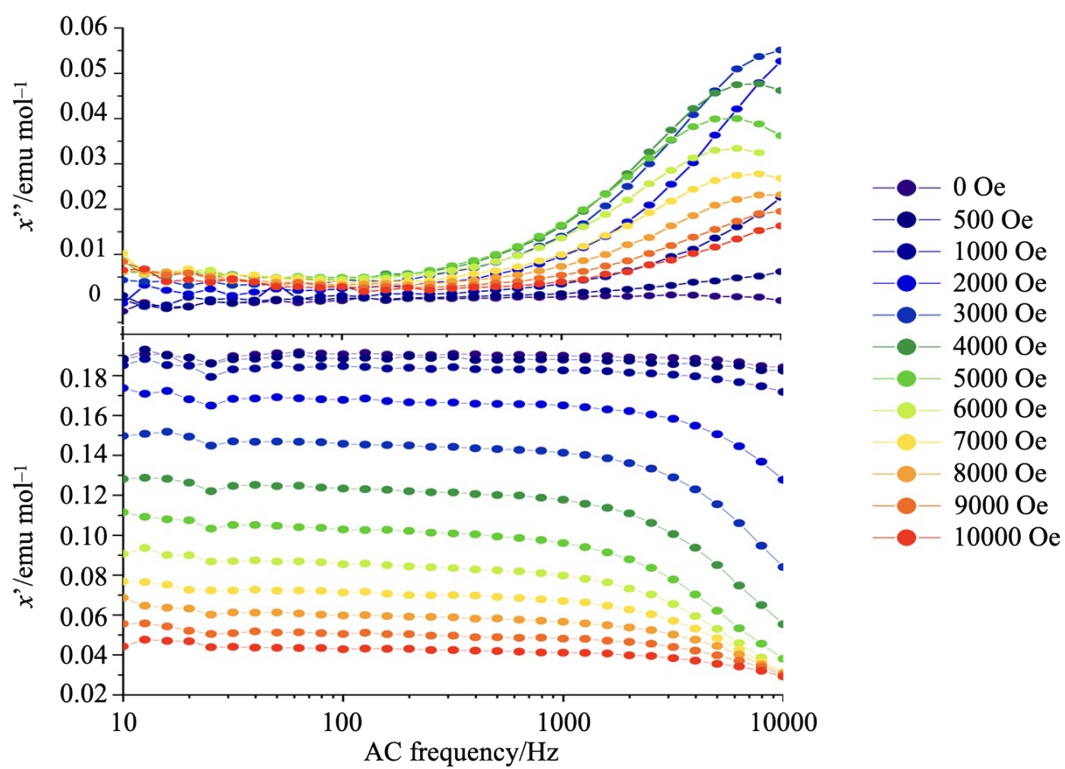

Figure S5. Field-dependent *ac* susceptibility for 1 at 2 K. The solid line connecting the colored dots are the guide for eye.

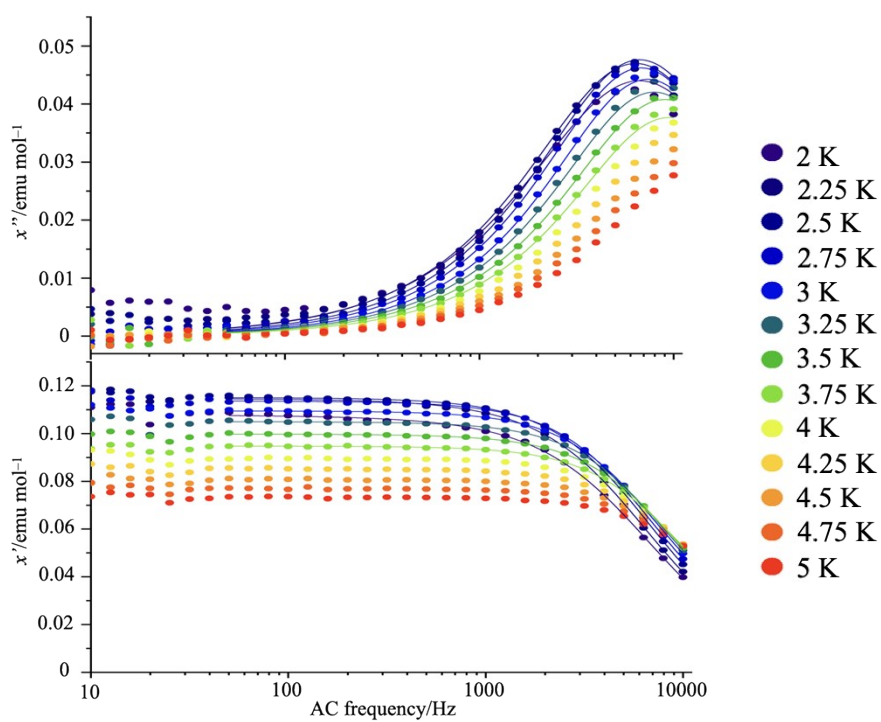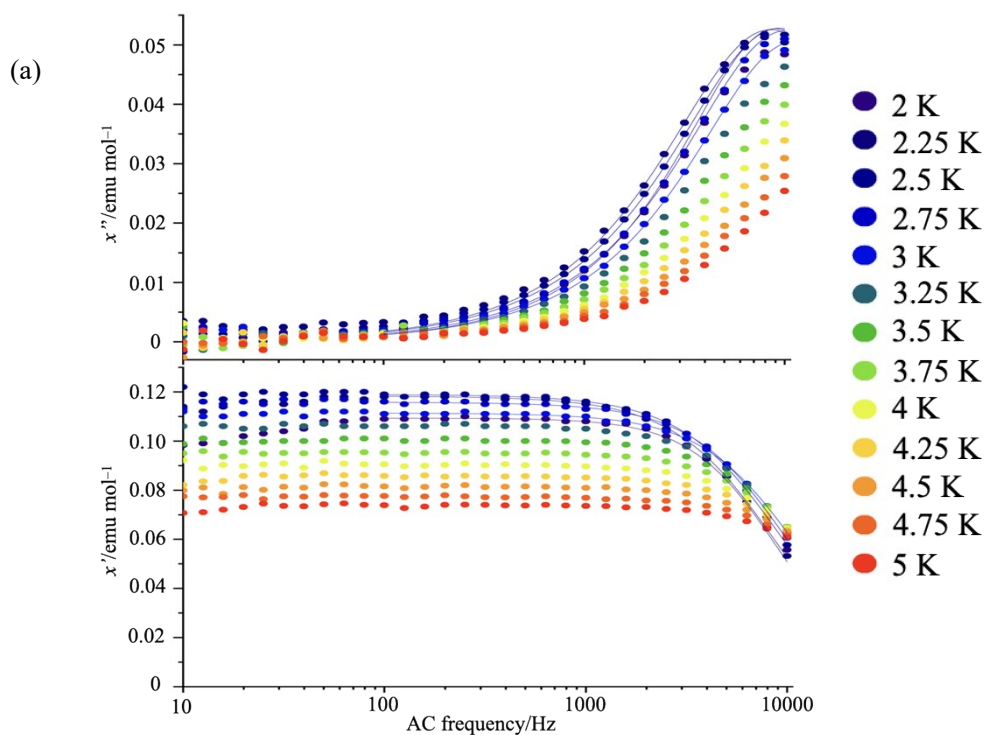

**Temperature-dependent *ac* susceptibility of 1@0.5 T**

(b)

Figure S6. Temperature-dependent  $ac$  susceptibility for crystalline (a), and ground (b) samples of **1** under an applied static magnetic field of 0.5 T.

## Field-dependent $ac$ susceptibility of **2** @ 5 K, 7.5 K, 10 K

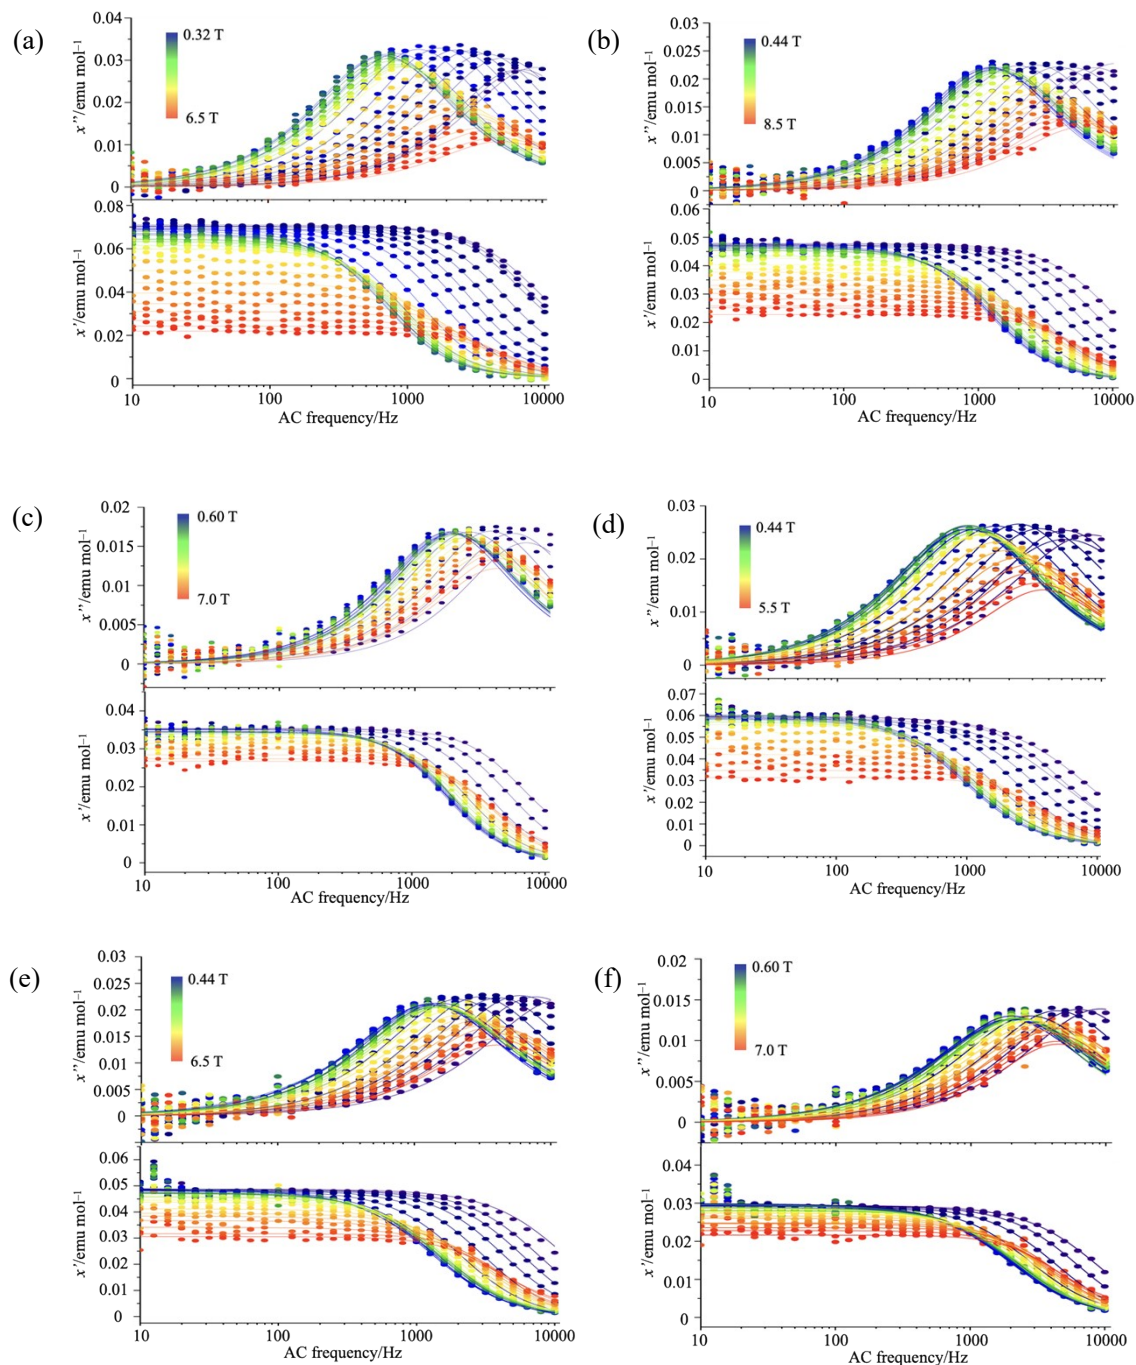

Figure S7. Field-dependent  $ac$  susceptibility for **2** at 5 K (a), 7.5 K (b), 10 K (c) and for the ground sample of **2** at 5 K (d), 7.5 K (e), 10 K (f). The solid lines are the fitting line by Cole-Cole plot.





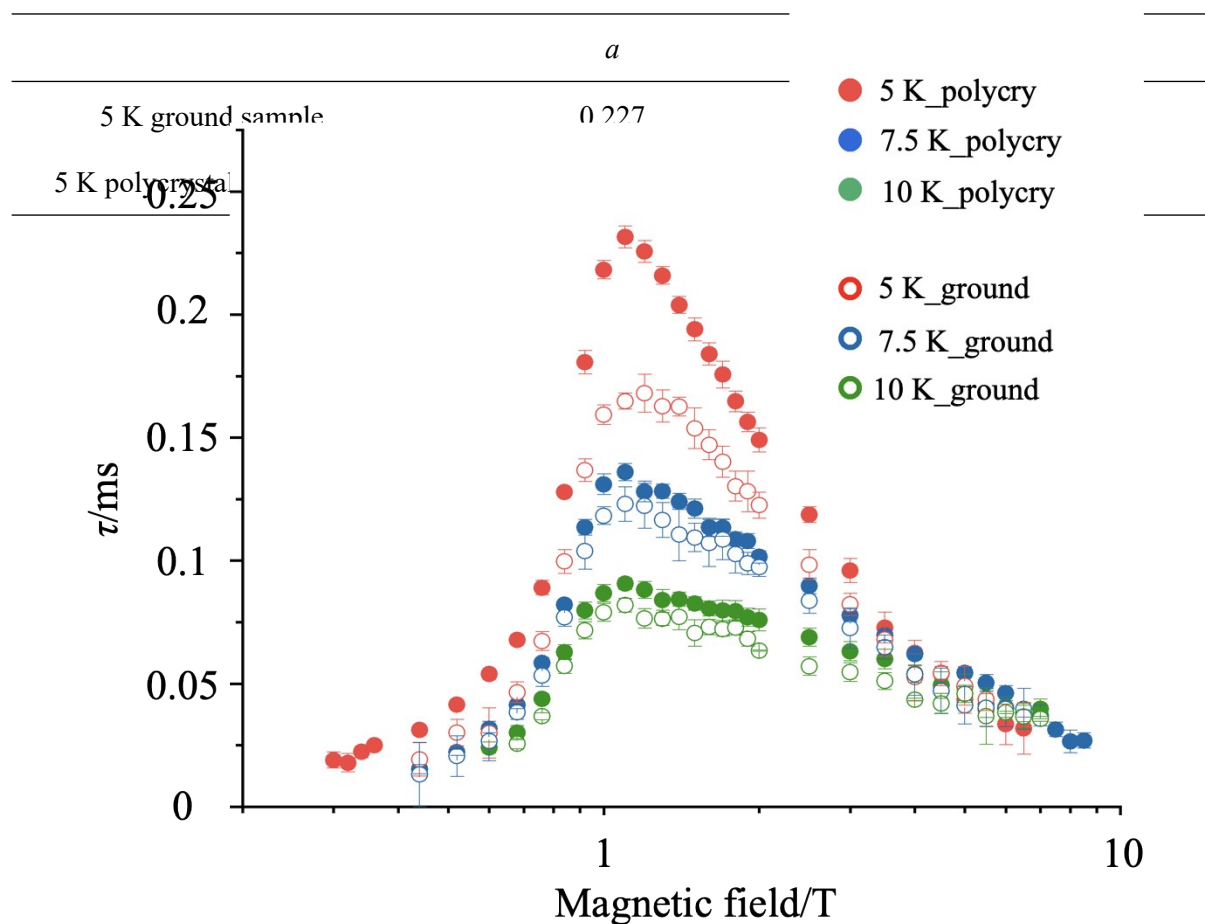

**Field-dependent relaxation time of 2@5 K, 7.5 K, 10 K**

Figure S8. Magnetic field dependence of  $\tau$  extracted from ac susceptibility at 5.0 K (red), 7.5 K (blue), 10 K (green) for polycrystalline **2** (filled circle) and ground **2** (hollow circle).

|                              |        |        |
|------------------------------|--------|--------|
| 7.5 K ground sample          | 0.155  | -0.722 |
| 7.5 K polycrystalline sample | 0.168  | -0.745 |
| 10 K ground sample           | 0.0885 | -0.481 |
| 10 K polycrystalline sample  | 0.102  | -0.471 |

Table S5. Fitting parameters for the magnetic field dependence of  $\tau$  in **2** at the high magnetic field region fitted by  $\tau = aB^n$

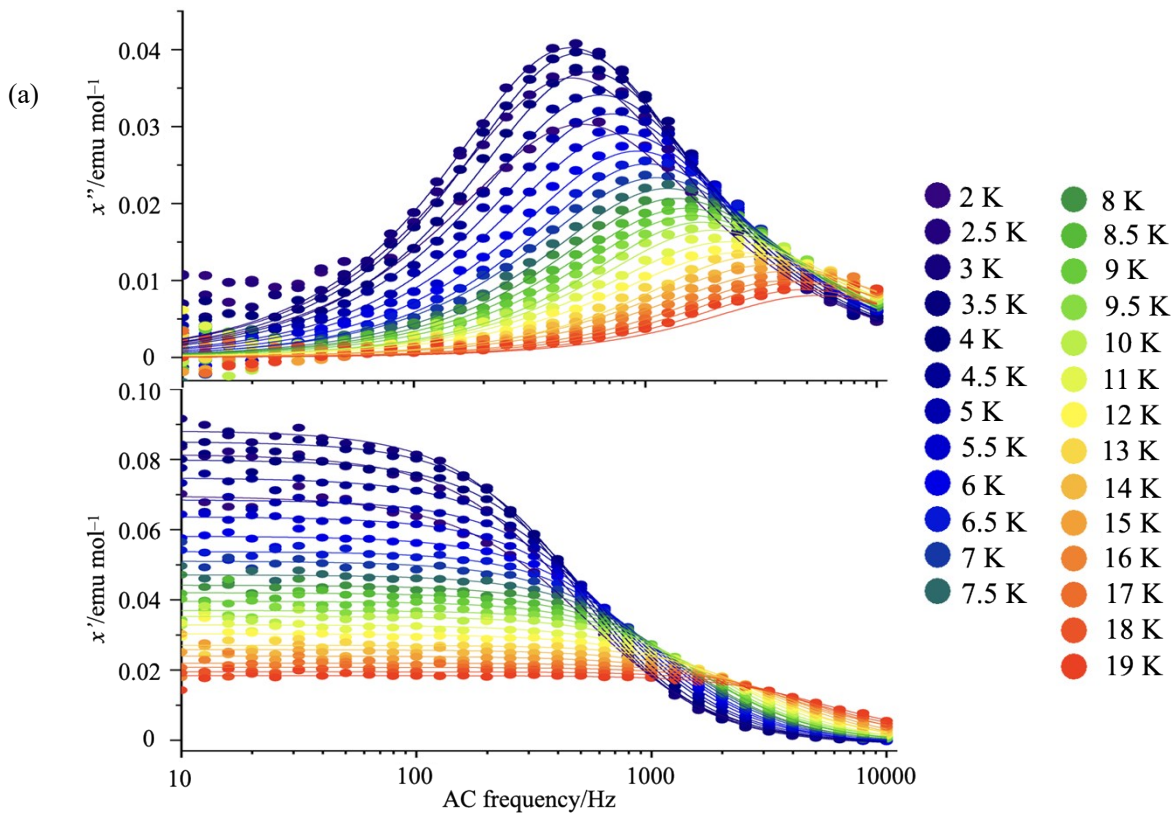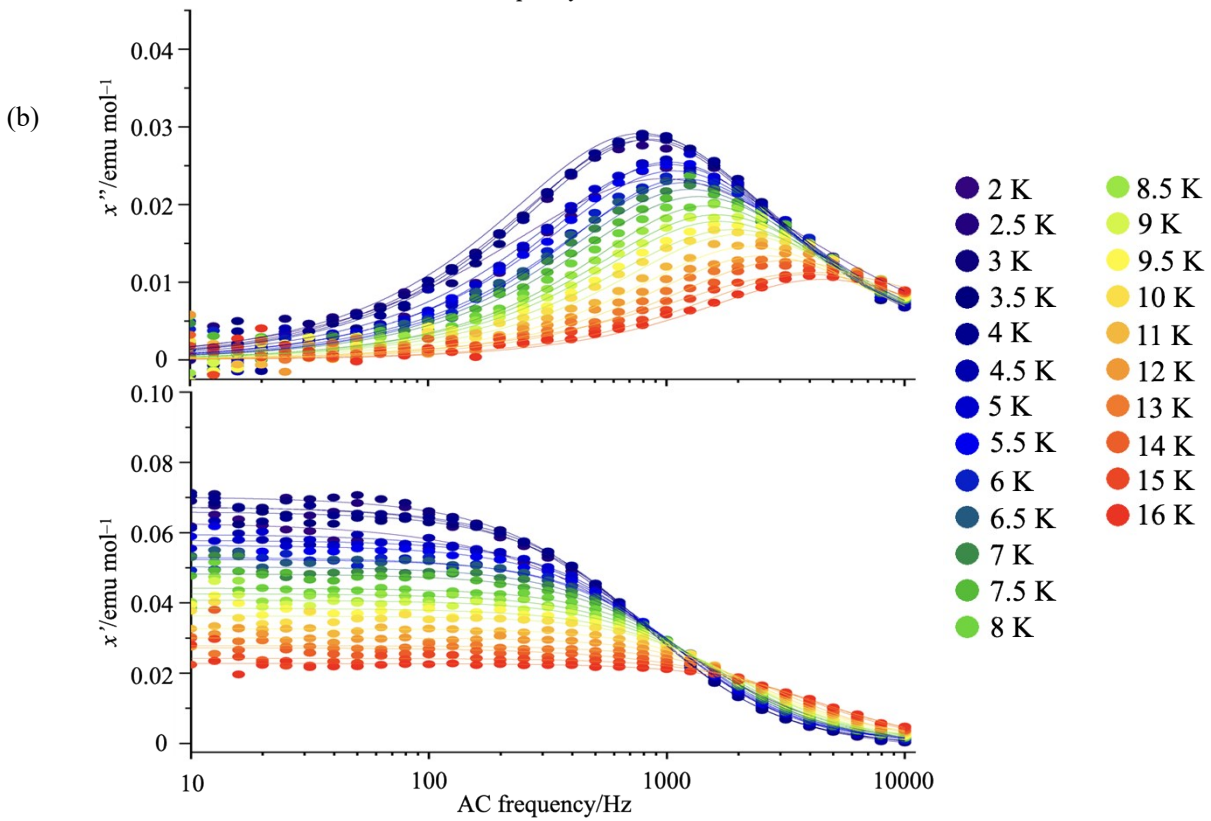

**Temperature-dependent *ac* susceptibility of 2@1 T**

Figure S9. Temperature-dependent *ac* susceptibility for crystalline (a) and ground (b) samples of **2** under an applied static magnetic field of 1 T. The solid lines are the fitting line by Cole-Cole plot.

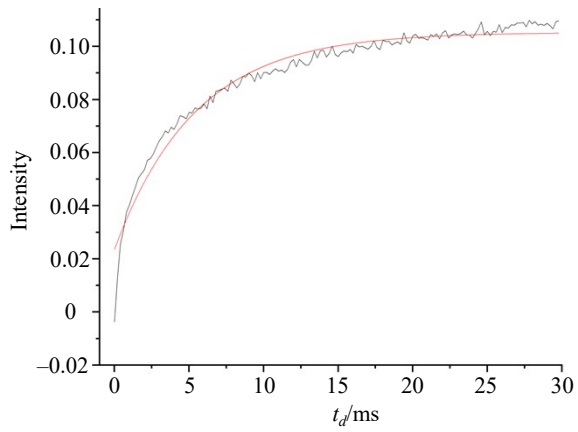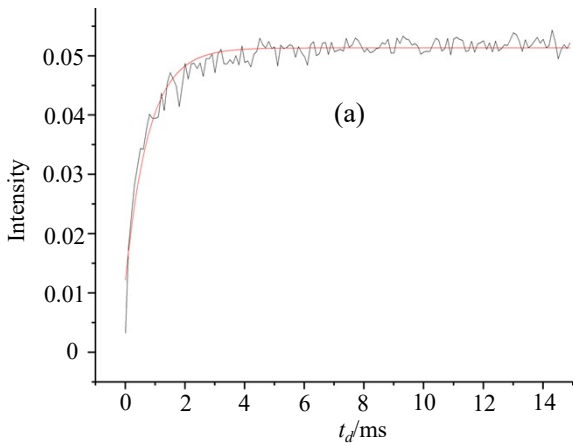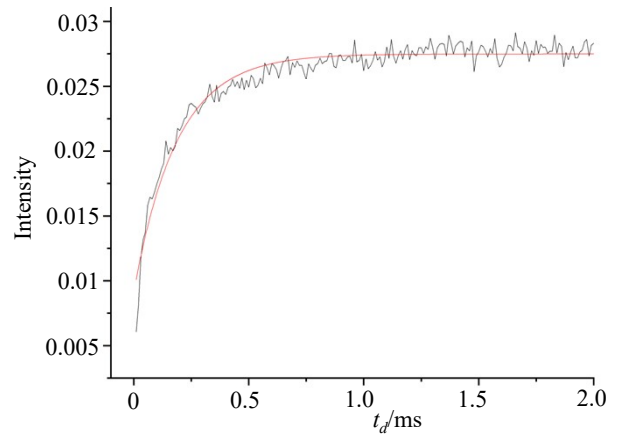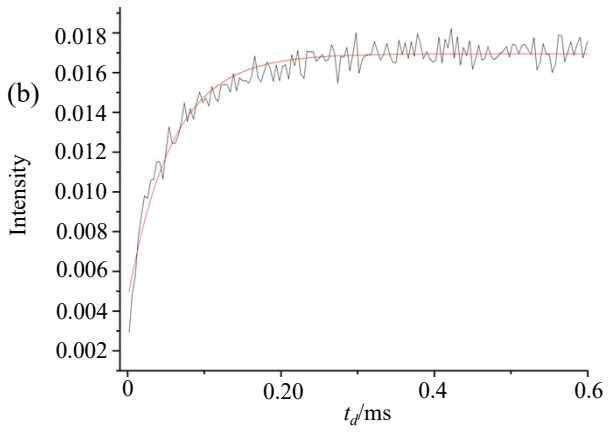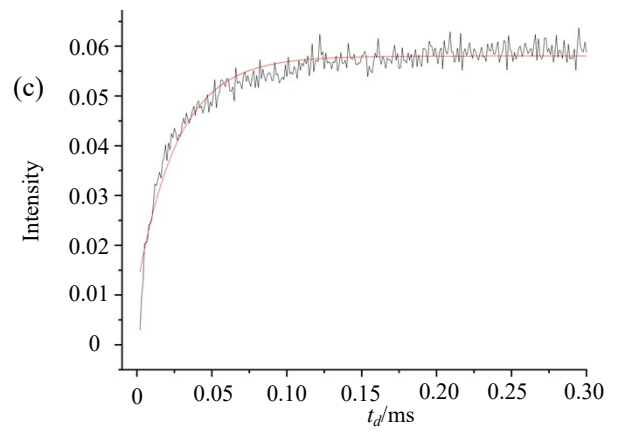

**The intensity of three pulse echoes in 1**

(d)

(e)

Figure S10. Changes in echo intensities for **1** with respect to  $t_d$  at 10 K (a), 20 K (b), 30 K (c), 40 K (d) and 50 K (e). Red lines are the fitting line shown in experimental section.

Table S6. Parameters of the fitting line shown in experimental section for **1**.

|          |       | 10 K     | 20 K     | 30 K     | 40 K    | 50 K     |
|----------|-------|----------|----------|----------|---------|----------|
| <b>1</b> | $I_0$ | 0.10525  | 0.05131  | 0.02748  | 0.01694 | 0.05801  |
|          | $I$   | -0.08188 | -0.03968 | -0.01834 | -0.0124 | -0.04669 |
|          | $T_1$ | 5.39553  | 0.78013  | 0.18701  | 0.05738 | 0.02702  |

|  |  | 10 K | 20 K | 30 K | 40 K | 50 K |
|--|--|------|------|------|------|------|
|--|--|------|------|------|------|------|

|          |       |         |         |         |          |          |
|----------|-------|---------|---------|---------|----------|----------|
| <b>2</b> | $I_0$ | 0.14915 | 0.07311 | 0.03591 | 0.14605  | 0.08885  |
|          | $I$   | -0.1    |         |         | -0.12697 | -0.07056 |
|          | $T_1$ | 5.41    |         |         | 0.04937  | 0.0271   |

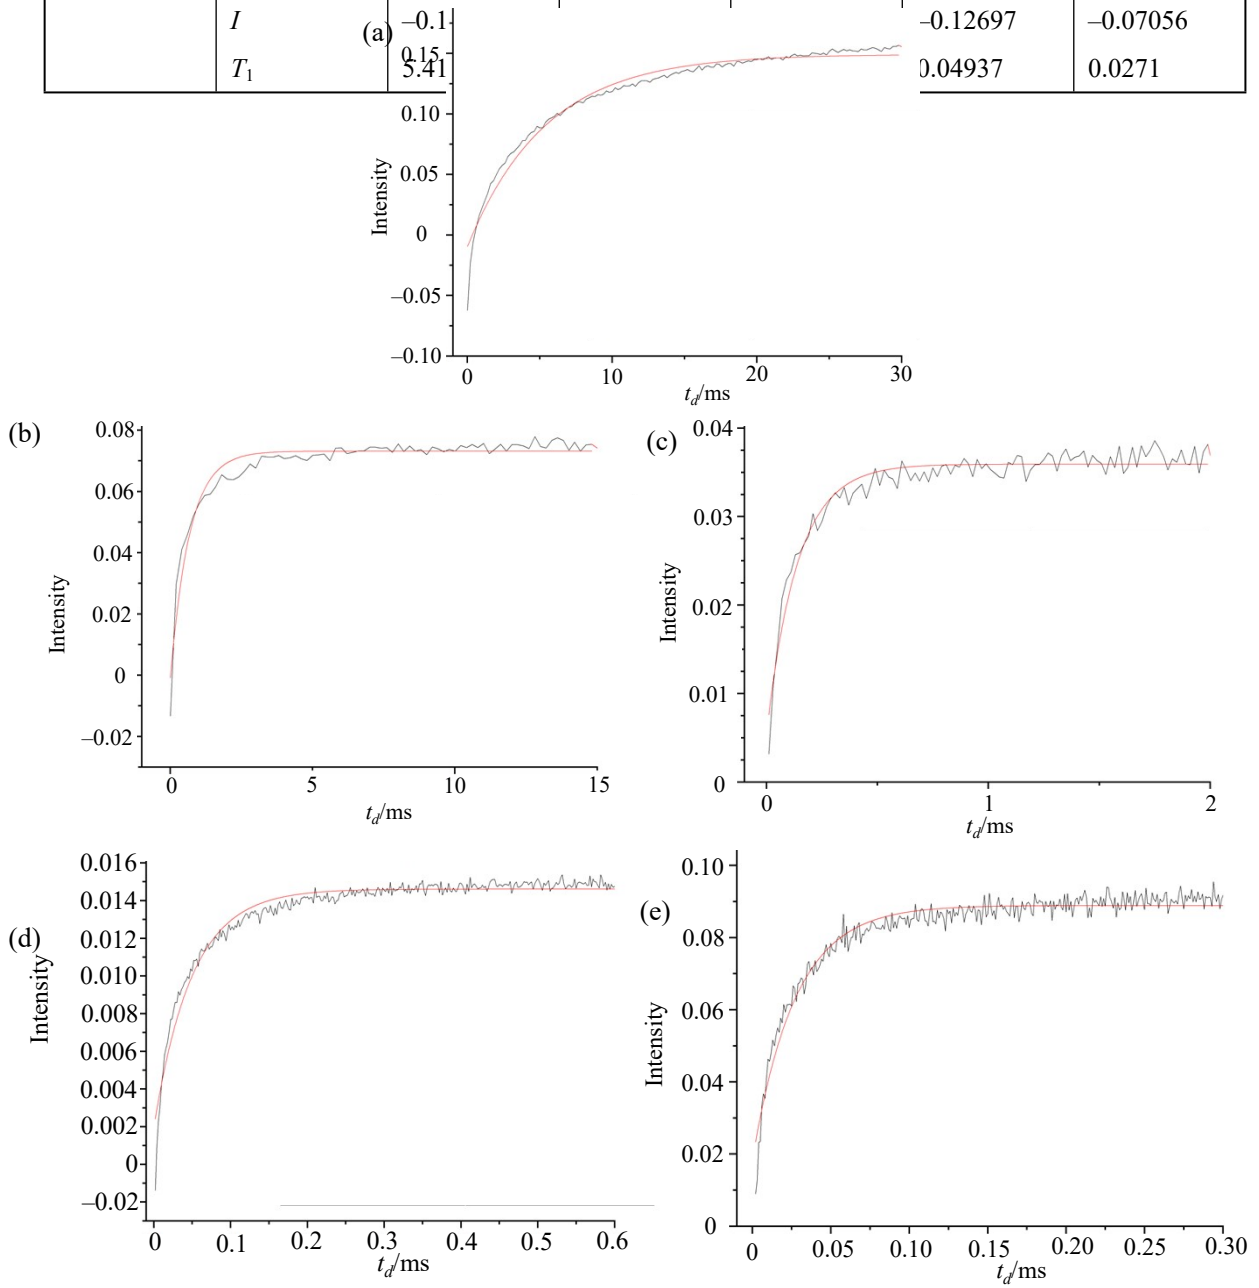

### The intensity of three pulse echo in 2

Figure S11. Changes in echo intensities for **2** with respect to  $t_d$  at 10 K (a), 20 K (b), 30 K (c), 40 K (d) and 50 K (e). Red lines are the fitting line shown in experimental section.

Table S7. Parameters of the fitting line shown in experimental section for **2**.

## The intensity of two pulse echo

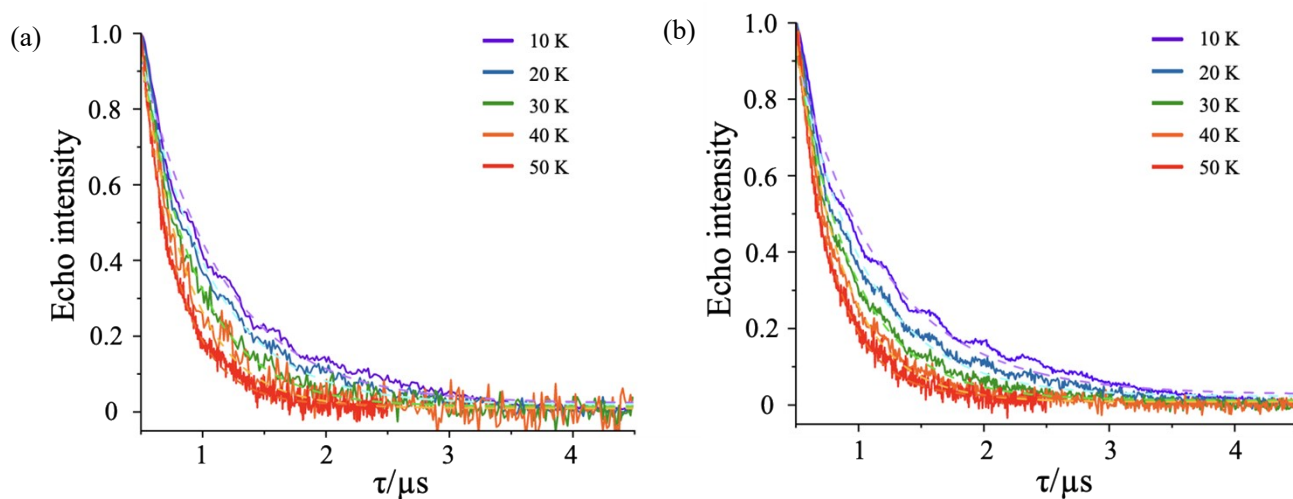

Figure S12. Changes in two pulse echo intensities for **1** (a) and **2** (b) with respect to  $\tau$ . Broken lines present the fitting line with the following parameters listed in Table S8.

|          |       | 10 K    | 20 K    | 30 K    | 40 K    | 50 K    |
|----------|-------|---------|---------|---------|---------|---------|
| <b>1</b> | $I_0$ | 0.02261 | 0.01917 | 0.01371 | 0.00941 | 0.01702 |
|          | $I$   | 1.98906 | 2.29075 | 2.81319 | 3.46705 | 5.23863 |
|          | $T_2$ | 1.29673 | 1.11011 | 0.90603 | 0.76644 | 0.58417 |
| <b>2</b> | $I_0$ | 0.02704 | 0.02257 | 0.01247 | 0.0084  | 0.01935 |
|          | $I$   | 1.81177 | 2.21836 | 2.72355 | 3.62226 | 5.20648 |
|          | $T_2$ | 1.40532 | 1.10995 | 0.91697 | 0.74739 | 0.58633 |

Table S8. Fitting parameters of the changes in two pulse echo intensities.



## Solid-state Raman and absorption spectroscopy

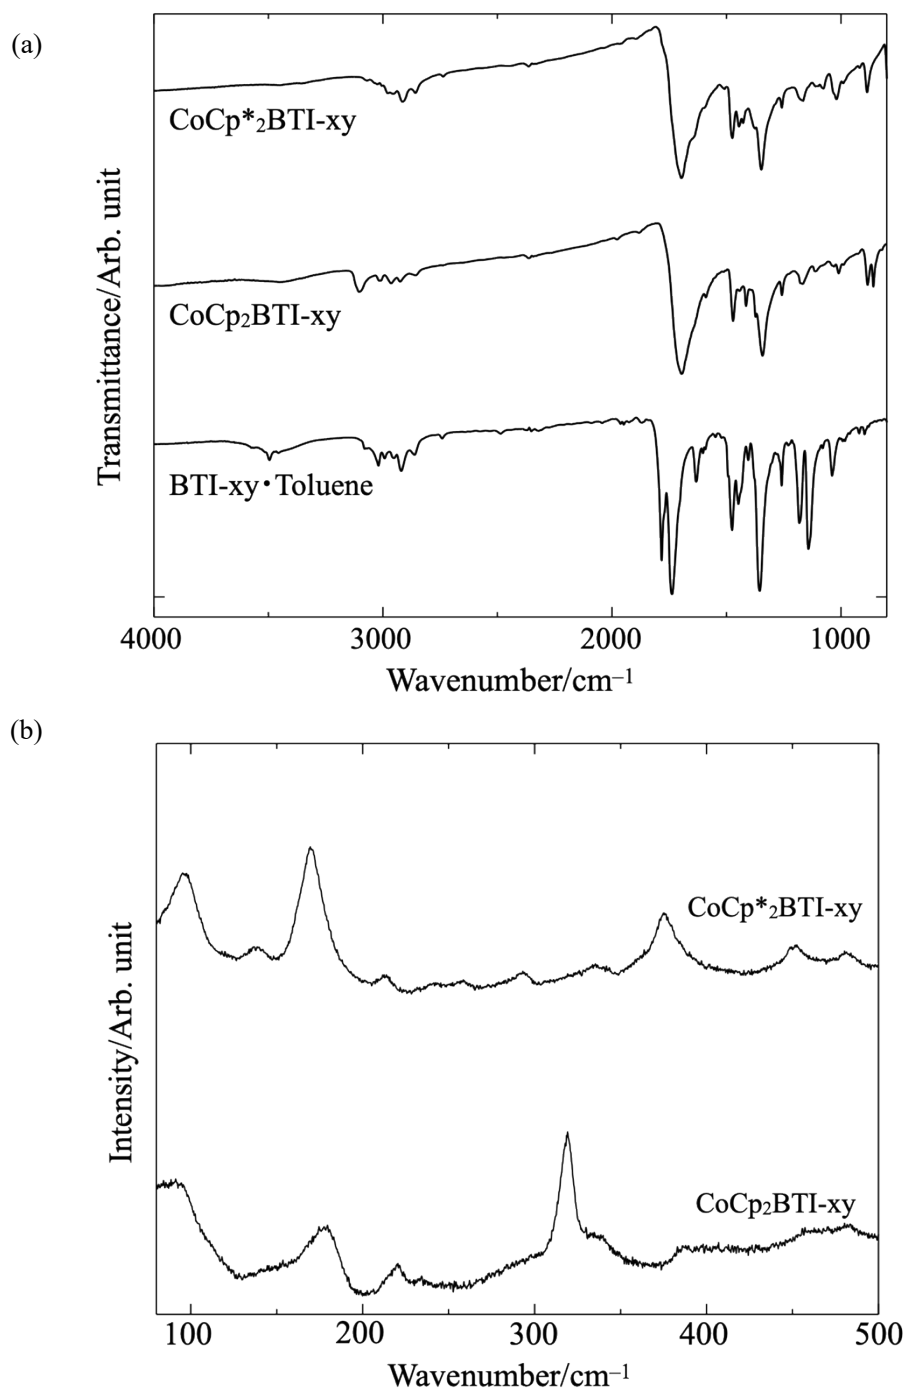

Figure S13. IR absorption spectra (a) and Raman spectra (b) of the obtained compounds.
